# Supplementary material for: Proteomic Profiling Comparing the Effects of Different Heat Treatments on Camel (Camelus dromedarius) Milk Whey Proteins
Source: PubMed Central journal article supplement (PMC5412307; doi:10.3390/ijms18040721), 2017-03-28
Supplement: ijms-18-00721-s001.pdf [file ijms-18-00721-s001.pdf]

## Supplementary Materials

**Table S1.** Mass spectrometry data showing significantly differentially abundant proteins identified in camel milk using 2D-DIGE [analysis type: matrix-assisted laser desorption/ionization; database: SwissProt; taxonomy: Mammalian].

| Spot Number <sup>a</sup> | Accession Number <sup>b</sup> | Pi <sup>c</sup> | MW <sup>d</sup> | Cov% <sup>e</sup> | Score <sup>f</sup> |
|--------------------------|-------------------------------|-----------------|-----------------|-------------------|--------------------|
| 219                      | Q9TUM0                        | 8.66            | 79158           | 21                | 59                 |
| 242                      | P31428                        | 5.9             | 46109           | 31                | 58                 |
| 247                      | Q9TUM0                        | 8.66            | 79158           | 25                | 62                 |
| 253                      | Q9TUM0                        | 8.66            | 79158           | 29                | 65                 |
| 255                      | P01009                        | 5.37            | 46878           | 36                | 68                 |
| 256                      | P02647                        | 5.56            | 30759           | 72                | 238                |
| 270                      | P02675                        | 8.54            | 56577           | 55                | 205                |
| 276                      | Q8CG71                        | 5.57            | 80959           | 19                | 63                 |
| 280                      | P02679                        | 5.37            | 52106           | 52                | 130                |
| 285                      | P02679                        | 5.37            | 52106           | 52                | 130                |
| 288                      | Q32KP7                        | 10.18           | 14535           | 38                | 65                 |
| 309                      | Q9TUM0                        | 8.66            | 79158           | 44                | 116                |
| 316                      | Q9TUM0                        | 8.66            | 79158           | 48                | 184                |
| 318                      | P79385                        | 7.61            | 53619           | 28                | 58                 |
| 340                      | Q9TUM0                        | 8.66            | 79158           | 35                | 114                |
| 333                      | P02768                        | 5.92            | 71317           | 41                | 88                 |
| 338                      | Q9TUM0                        | 8.66            | 79158           | 46                | 150                |
| 339                      | Q9TUM0                        | 8.66            | 79158           | 42                | 173                |
| 343                      | Q9TUM0                        | 8.66            | 79158           | 38                | 131                |
| 348                      | Q9TUM0                        | 8.66            | 79158           | 43                | 175                |
| 353                      | P02679                        | 5.37            | 52106           | 46                | 145                |
| 357                      | Q9TUM0                        | 8.66            | 79158           | 30                | 110                |
| 358                      | Q9TUM0                        | 8.66            | 79158           | 44                | 143                |
| 359                      | Q9TUM0                        | 8.66            | 79158           | 48                | 175                |
| 360                      | P15539                        | 9.86            | 57449           | 18                | 60                 |
| 361                      | Q6IML7                        | 8.72            | 31329           | 33                | 64                 |
| 368                      | Q9TUM0                        | 8.66            | 79158           | 45                | 123                |
| 373                      | Q9TUM0                        | 8.66            | 79158           | 50                | 171                |
| 384                      | P02750                        | 6.45            | 38382           | 42                | 71                 |
| 396                      | Q9GK12                        | 9.1             | 21763           | 31                | 58                 |
| 398                      | Q9TUM0                        | 8.66            | 79158           | 36                | 128                |
| 400                      | Q7Z713                        | 5.39            | 17650           | 52                | 60                 |
| 407                      | Q9H3Z7                        | 8.9             | 53205           | 16                | 57                 |
| 409                      | Q8MJ14                        | 6.74            | 22863           | 37                | 59                 |

|     |        |       |       |    |     |
|-----|--------|-------|-------|----|-----|
| 413 | P02790 | 6.55  | 52385 | 48 | 96  |
| 433 | Q9TUM0 | 8.66  | 79158 | 42 | 139 |
| 438 | Q9TUM0 | 8.66  | 79158 | 48 | 158 |
| 440 | Q8R0F8 | 7.59  | 25484 | 42 | 58  |
| 454 | Q5E9H8 | 9.3   | 42307 | 25 | 60  |
| 459 | Q9TUM0 | 8.66  | 79158 | 46 | 129 |
| 462 | P01876 | 6.08  | 38486 | 42 | 58  |
| 472 | Q96SZ5 | 5.68  | 30074 | 24 | 59  |
| 474 | Q9TUM0 | 8.66  | 79158 | 48 | 146 |
| 492 | Q95KI3 | 8.95  | 41206 | 22 | 58  |
| 500 | Q9TUM0 | 8.66  | 79158 | 51 | 172 |
| 501 | P00435 | 6.74  | 22930 | 40 | 60  |
| 516 | Q6GPH4 | 8.57  | 35857 | 40 | 62  |
| 517 | Q8NBT0 | 7.31  | 45551 | 28 | 60  |
| 539 | P02675 | 5.37  | 52106 | 50 | 129 |
| 543 | Q68G74 | 8.66  | 40445 | 21 | 73  |
| 546 | Q6AYB4 | 5.41  | 55170 | 24 | 59  |
| 553 | Q2KJ64 | 6.09  | 35272 | 34 | 62  |
| 561 | P79385 | 6.15  | 46722 | 29 | 63  |
| 562 | P79385 | 6.15  | 46722 | 25 | 58  |
| 564 | P79385 | 6.15  | 46722 | 27 | 65  |
| 568 | P46065 | 4.4   | 23723 | 62 | 64  |
| 572 | P06323 | 9.13  | 14908 | 37 | 60  |
| 579 | P79385 | 6.15  | 46722 | 34 | 75  |
| 574 | P79385 | 6.15  | 46722 | 34 | 79  |
| 578 | Q9TUM0 | 8.66  | 79158 | 25 | 92  |
| 582 | P04217 | 5.58  | 54809 | 37 | 90  |
| 585 | Q9QYE2 | 7.81  | 76169 | 19 | 57  |
| 587 | Q6AYB4 | 5.41  | 55170 | 23 | 59  |
| 588 | Q28560 | 5.62  | 58814 | 20 | 60  |
| 594 | Q2KJ64 | 6.09  | 35272 | 36 | 61  |
| 595 | Q13595 | 11.27 | 32726 | 39 | 58  |
| 596 | P02675 | 5.37  | 52106 | 48 | 120 |
| 539 | P70097 | 10.04 | 18714 | 50 | 65  |
| 543 | Q68G74 | 8.66  | 40445 | 21 | 73  |
| 548 | Q6AYB4 | 5.41  | 55170 | 24 | 55  |
| 553 | Q2KJ64 | 6.09  | 35272 | 34 | 54  |
| 561 | P79385 | 6.15  | 46722 | 29 | 63  |
| 562 | P79385 | 6.15  | 46722 | 25 | 58  |
| 560 | P79385 | 6.15  | 46722 | 27 | 65  |
| 570 | P46065 | 4.4   | 23723 | 62 | 64  |
| 576 | P06323 | 6.15  | 46722 | 34 | 75  |

|      |        |       |       |    |     |
|------|--------|-------|-------|----|-----|
| 579  | P79385 | 6.15  | 46722 | 34 | 79  |
| 578  | Q9TUM0 | 8.66  | 79158 | 25 | 92  |
| 582  | P04217 | 5.58  | 54809 | 37 | 90  |
| 586  | Q9QYE2 | 7.81  | 76169 | 19 | 59  |
| 590  | Q6AYB4 | 5.41  | 55170 | 23 | 59  |
| 588  | Q28560 | 5.62  | 58814 | 20 | 60  |
| 593  | P34896 | 6.09  | 35272 | 36 | 61  |
| 600  | Q13595 | 11.27 | 32726 | 39 | 58  |
| 596  | P02675 | 5.37  | 52106 | 48 | 120 |
| 597  | P70097 | 10.04 | 18714 | 50 | 65  |
| 604  | Q68SB1 | 9.54  | 62870 | 30 | 57  |
| 615  | P00738 | 6.13  | 45861 | 21 | 70  |
| 616  | P00747 | 7.04  | 93247 | 30 | 77  |
| 621  | P32261 | 6.1   | 52484 | 24 | 60  |
| 629  | Q62803 | 6.09  | 59059 | 26 | 64  |
| 644  | Q91Z85 | 6.32  | 58312 | 22 | 59  |
| 662  | P16261 | 9.97  | 35375 | 30 | 61  |
| 664  | Q8HX86 | 6.46  | 28752 | 35 | 59  |
| 723  | P10909 | 5.89  | 53031 | 26 | 78  |
| 769  | Q9NSQ0 | 9.73  | 12568 | 46 | 68  |
| 793  | O14791 | 5.6   | 44009 | 32 | 59  |
| 796  | Q3MID3 | 8.08  | 56863 | 26 | 85  |
| 803  | P15169 | 6.86  | 52538 | 33 | 62  |
| 819  | Q62803 | 6.09  | 59059 | 14 | 57  |
| 827  | Q9UHR4 | 8.82  | 57189 | 19 | 58  |
| 828  | Q9CTN5 | 5.45  | 67339 | 18 | 59  |
| 832  | Q3UR70 | 6.24  | 98382 | 11 | 64  |
| 847  | P24310 | 10.12 | 9169  | 60 | 70  |
| 849  | Q8NBP0 | 6.56  | 97607 | 19 | 54  |
| 856  | Q29563 | 7.62  | 36534 | 23 | 62  |
| 917  | P15522 | 5.36  | 17281 | 30 | 59  |
| 985  | P15522 | 5.36  | 17281 | 25 | 57  |
| 1013 | P15522 | 5.36  | 17281 | 30 | 54  |
| 1041 | O14618 | 5.32  | 29536 | 30 | 60  |
| 1069 | P00710 | 5     | 14877 | 65 | 66  |
| 1090 | P00710 | 5     | 14877 | 53 | 94  |
| 1105 | P00710 | 5     | 14877 | 45 | 64  |
| 1147 | Q8NFM3 | 5.85  | 12579 | 20 | 51  |
| 1155 | Q86X95 | 5.82  | 81606 | 26 | 99  |
| 1167 | A8K979 | 9.12  | 78549 | 22 | 66  |

<sup>a</sup> Spot numbers correspond to those included in the 2D-image.

<sup>b</sup> Protein accession number for SWISSPROT Database.

<sup>c</sup> Theoretical isoelectric point.

<sup>d</sup> Theoretical relative mass.

<sup>e</sup> % of peptide sequence Coverage.

<sup>f</sup> MASCOT score.

**Table S2.** Experimental design: nine samples of camel milk were run on five analytical 2D-DIGE gels; the samples were labeled randomly with Cy3 and Cy5; a pooled sample was used as an internal standard and was stained with Cy2.

| GEL | CY3         | CY5         | CY2  |
|-----|-------------|-------------|------|
| 1   | CM-RT (1)   | CM-63°C (1) | POOL |
| 2   | CM-98°C (1) | CM-RT (2)   | POOL |
| 3   | CM-63°C (2) | CM-98°C (2) | POOL |
| 4   | CM-RT (3)   | CM-63°C (3) | POOL |
| 5   | CM-98°C (3) | -           | POOL |
